# Supplementary material for: Small molecule carbazole-based diketopyrrolopyrroles with tetracyanobutadiene acceptor unit as a non-fullerene acceptor for bulk heterojunction organic solar cells
Source: Royal Society of Chemistry journal article supplement (doi:10.1039/c6ta09607g), 2017-01-01
Supplement: c6ta09607g1.pdf [file c6ta09607g1.pdf]

## Supporting Information

### Small molecule carbazole based diketopyrrolopyrroles with tetracyanobutadiene acceptor unit as Non-Fullerene acceptor for Bulk Heterojunction Organic Solar Cells

Yuvraj Patil<sup>a</sup>, Rajneesh Misra<sup>a\*</sup>, M. L. Keshtov<sup>b</sup>, Ganesh D. Sharma<sup>c\*</sup>

<sup>a</sup>Department of Chemistry

Indian Institute of Technology, Indore (MP) 453552, India

<sup>b</sup>Institute of Organoelement Compounds of the Russian Academy of Sciences, Vavilova St., 28, 119991 Moscow, Russian Federation

<sup>c</sup>Department of Physics, The LNM Institute of Information Technology (Deemed University), Jamdoli, Jaipur (Raj.), 302031, India

| Table of Contents.....                                                                                  | Page No.  |
|---------------------------------------------------------------------------------------------------------|-----------|
| <b>Experimental part.....</b>                                                                           | <b>S1</b> |
| <b>Table S1</b> Photovoltaic parameters for the OSCs based on SVA treated <b>P:DPP8</b> active layers.. | <b>S2</b> |
| <b>Table S2</b> Photovoltaic parameters for the OSCs based on SVA treated <b>P:DPP7</b> active layers.. | <b>S3</b> |
| <b>Fig. S1</b> Normalized absorption spectra of SVA <b>DPP7</b> and <b>DPP8</b> thin film.....          | <b>S3</b> |
| <b>Fig. S2</b> Normalized absorption spectra of D-A copolymer <b>P</b> .....                            | <b>S4</b> |

### Experimental details

#### Device fabrication and characterization

The chemicals were used as received unless otherwise indicated. The PSCs were fabricated with a configuration of ITO/ PEDOT:PSS (40 nm)/**P:DPP7** or **DPP8**/PFN/Al. A thin layer of PEDOT:PSS was deposited through spin-coating on pre-cleaned ITO-coated glass substrate from a PEDOT:PSS aqueous solution (Baytron P VP AI 4083) at 2000 rpm and dried subsequently at 120 °C for 15 min in air. The active blend layer was spin-coated from THF solution containing a blend of **P** and **DPP7** or **DPP8** onto the PEDOT:PSS layer. The optimized conditions are with a spin rate of 2000 rpm and with a blend THF solution containing weight ratio of 1: 2 between the

donor and acceptor with total concentration 18 mg/mL for both **DPP7** and **DPP8** acceptors. For solvent vapour annealing (SVA) treatment, the films were subjected to chloroform vapor, for a period of 60 s in a sealed petri dish. Then methanol solution of PFN at a concentration of 1.0 mg/mL was deposited on the top the active layer at 3000 rpm for 30 s to afford a thickness of 15 nm. Finally, top Al electrode was deposited in vacuum onto the cathode buffer layer at a pressure of  $\approx 1.0 \times 10^{-5}$  Pa. The active area of the device was 10 mm<sup>2</sup>. We have fabricated four devices in one substrate. The current-voltage ( $J-V$ ) characteristics of the PSCs were measured on a computer controlled Keithley 2450 Source meter. Solar Simulator with a 450 W xenon lamp and an air mass (AM) 1.5 filter was used as the light source. The light intensity was kept constant at 100 mW/cm<sup>2</sup>. The IPCE of the devices was measured at illuminating the device through the light source and monochromator and the resulting current was measured using a Keithley electrometer under short circuit condition.

**Table S1** Photovoltaic parameters for the OSCs based on SVA treated **P:DPP8** active layers.

| Device No | $J_{sc}$ (mA/cm <sup>2</sup> ) | $V_{oc}$ (V) | FF   | PCE (%) |
|-----------|--------------------------------|--------------|------|---------|
| 1         | 13.85                          | 0.91         | 0.56 | 7.06    |
| 2         | 14.07                          | 0.89         | 0.57 | 7.14    |
| 3         | 13.49                          | 0.91         | 0.58 | 7.12    |
| 4 (best)  | 13.78                          | 0.90         | 0.58 | 7.19    |
| 5         | 14.14                          | 0.91         | 0.55 | 7.08    |
| 6         | 13.48                          | 0.90         | 0.58 | 7.04    |
| 7         | 13.28                          | 0.91         | 0.58 | 7.01    |
| 8         | 13.78                          | 0.90         | 0.57 | 7.07    |

**Table S2** Photovoltaic parameters for the OSCs based on SVA treated **P:DPP7** active layers.

| Device No | $J_{sc}$ (mA/cm <sup>2</sup> ) | $V_{oc}$ (V) | FF   | PCE (%) |
|-----------|--------------------------------|--------------|------|---------|
| 1         | 10.82                          | 0.92         | 0.48 | 4.78    |
| 2         | 10.16                          | 0.94         | 0.50 | 4.75    |
| 3         | 10.73                          | 0.92         | 0.47 | 4.64    |
| 4 (best ) | 10.56                          | 0.94         | 0.49 | 4.86    |
| 5         | 10.56                          | 0.93         | 0.48 | 4.69    |
| 6         | 10.06                          | 0.92         | 0.50 | 4.63    |
| 7         | 10.58                          | 0.92         | 0.48 | 4.68    |
| 8         | 10.66                          | 0.95         | 0.47 | 4.76    |

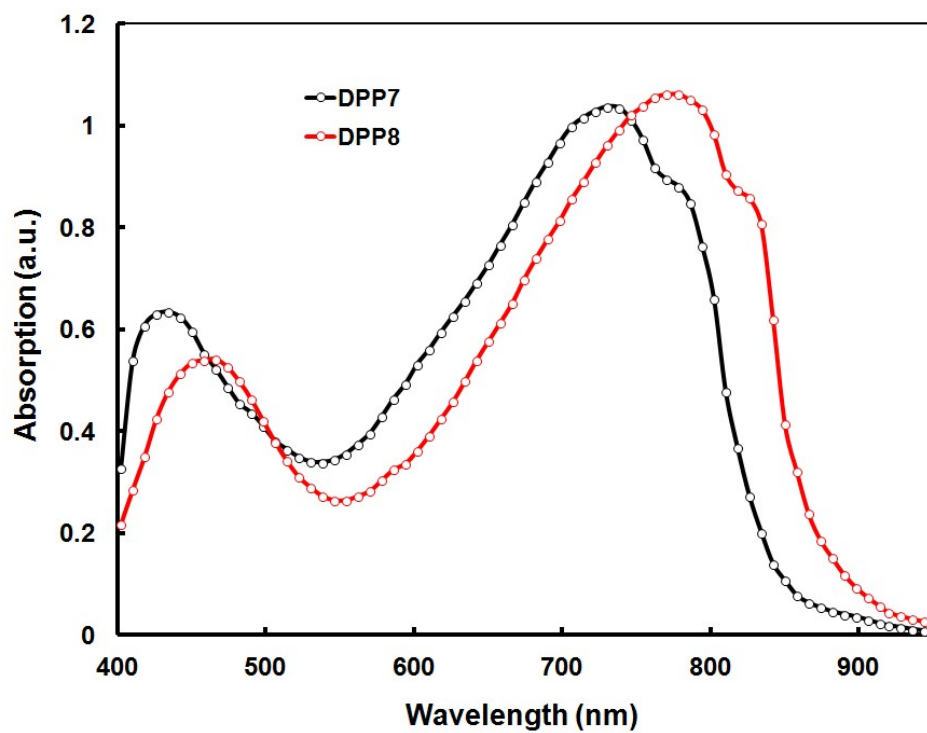

**Fig. S1** Normalized absorption spectra of SVA **DPP7** and **DPP8** thin film.

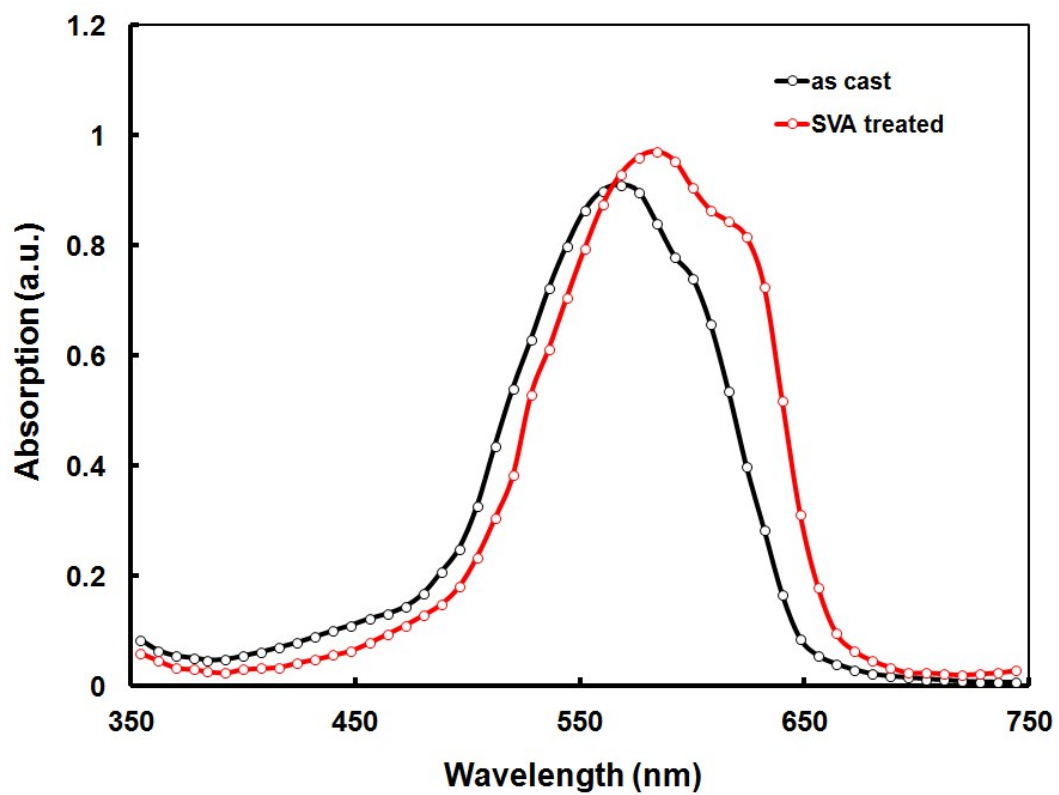

**Fig. S2** Normalized absorption spectra of as cast the SVA treated D-A copolymer **P** thin films.
